# Supplementary material for: Process for the Implementation of Evidence-Based Parenteral Nutrition in German Perinatal Centres – Outcomes of a Multidisciplinary Network
Source: PubMed Central journal article supplement — Z Geburtshilfe Neonatol. 2022 Mar 1;226(4):227–32. [Article in German] doi: 10.1055/a-1711-3281 (PMC9398564; doi:10.1055/a-1711-3281), 2022-03-01
Supplement: 10-1055-a-1711-3281-12-2021-0538.pdf [file 10-1055-a-1711-3281-12-2021-0538.pdf]

## Autorenliste

### Arbeitsgruppe parenterale Ernährung von EFCNI, GNPI und ADKA (alphabetisch):

ADKA Bundesverband Deutscher Krankenhausapotheker e.V.  
 EFCNI European Foundation for the Care of Newborn Infants  
 GNPI Gesellschaft für Neonatologie und Pädiatrische Intensivmedizin

| Vorname   | Mittelname<br>(Initialien) | Nachname        | Affiliation                                                                                                                                                                                          | Land        |
|-----------|----------------------------|-----------------|------------------------------------------------------------------------------------------------------------------------------------------------------------------------------------------------------|-------------|
| Jürgen    |                            | Babl            | Bundesverband Deutscher Krankenhausapotheker e.V., Berlin,<br>Universitätsklinikum der Ludwig-Maximilians-Universität, München                                                                       | Deutschland |
| Christof  |                            | Dame            | Charité – Universitätsmedizin Berlin                                                                                                                                                                 | Deutschland |
| Frank     |                            | Dörje           | Bundesverband Deutscher Krankenhausapotheker e.V., Berlin,<br>Apotheke des Universitätsklinikums Erlangen,<br>Friedrich-Alexander-Universität Erlangen-Nürnberg                                      | Deutschland |
| Katarina  |                            | Eglin           | Bundesverband „Das frühgeborene Kind“ e.V., Frankfurt am Main                                                                                                                                        | Deutschland |
| Harald    |                            | Erdmann         | Bundesverband Deutscher Krankenhausapotheker e.V., Berlin,<br>Malteser Norddeutschland gGmbH, St. Franziskus-Hospital, Flensburg                                                                     | Deutschland |
| Christoph |                            | Fusch           | Gesellschaft für Neonatologie und Pädiatrische Intensivmedizin, Berlin,<br>Klinik für Neugeborene, Kinder und Jugendliche, Klinikum Nürnberg,<br>Paracelsus Medizinische Privatuniversität, Nürnberg | Deutschland |
| Nadja     |                            | Haiden          | Universitätsklinik für Kinder- und Jugendheilkunde Wien                                                                                                                                              | Österreich  |
| Christoph |                            | Härtel          | Kinderklinik und Poliklinik des Universitätsklinikums Würzburg                                                                                                                                       | Deutschland |
| Ralph     |                            | Heimke-Brinck   | Bundesverband Deutscher Krankenhausapotheker e.V., Berlin,<br>Apotheke des Universitätsklinikums Erlangen                                                                                            | Deutschland |
| Roland    |                            | Hentschel       | Zentrum für Kinder- und Jugendmedizin, Universität Freiburg                                                                                                                                          | Deutschland |
| Egbert    |                            | Herting         | Universitätsklinikum Schleswig-Holstein, Campus Lübeck                                                                                                                                               | Deutschland |
| Simone    | M.                         | Hock            | Zentrum für Kinder- und Jugendmedizin, Universität Freiburg                                                                                                                                          | Deutschland |
| Julia     |                            | Hoffmann        | European Foundation for the Care of Newborn Infants                                                                                                                                                  | Deutschland |
| Torsten   |                            | Hoppe-Tichy     | Apotheke des Universitätsklinikums Heidelberg                                                                                                                                                        | Deutschland |
| Johanna   |                            | Kostenzer       | European Foundation for the Care of Newborn Infants                                                                                                                                                  | Deutschland |
| Silke     |                            | Mader           | European Foundation for the Care of Newborn Infants                                                                                                                                                  | Deutschland |
| Walter    |                            | Mihatsch        | Hochschule Neu-Ulm,<br>Universität Ulm                                                                                                                                                               | Deutschland |
| Birgit    |                            | Pätzmann-Sietas | Berufsverbandes Kinderkrankenpflege Deutschland e.V., Hannover                                                                                                                                       | Deutschland |
| Johanna   | M.                         | Pfeil           | European Foundation for the Care of Newborn Infants<br>Klinik und Poliklinik für Augenheilkunde, Universitätsmedizin Greifswald                                                                      | Deutschland |

| <b>Vorname</b>   | <b>Mitteldname<br/>(Initialien)</b> | <b>Nachname</b>   | <b>Affiliation</b>                                                                                                         | <b>Land</b>                |
|------------------|-------------------------------------|-------------------|----------------------------------------------------------------------------------------------------------------------------|----------------------------|
| <b>Brar</b>      |                                     | <b>Piening</b>    | Charité – Universitätsmedizin Berlin                                                                                       | Deutschland                |
| <b>Sebastian</b> |                                     | <b>Schubert</b>   | Bundesverband Deutscher Krankenhausapotheker e.V., Berlin,<br>Universitätsmedizin der Johannes-Gutenberg-Universität Mainz | Deutschland                |
| <b>Stephan</b>   |                                     | <b>Seeliger</b>   | KJF Klinik Sankt Elisabeth, Neuburg                                                                                        | Deutschland                |
| <b>Thomas</b>    |                                     | <b>Vorwerk</b>    | Bundesverband Deutscher Krankenhausapotheker e.V.,<br>Zentralapotheke KRH Klinikum Region Hannover                         |                            |
| <b>Luc</b>       | <b>J.I.</b>                         | <b>Zimmermann</b> | European Foundation for the Care of Newborn Infants,<br>Maastricht UMC+                                                    | Deutschland<br>Niederlande |
